# Supplementary material for: A Small-Molecule Inhibitor of T. gondii Motility Induces the Posttranslational Modification of Myosin Light Chain-1 and Inhibits Myosin Motor Activity
Source: PLoS Pathog. 2010 Jan 15;6(1):e1000720. doi: 10.1371/journal.ppat.1000720 (PMC2800044; doi:10.1371/journal.ppat.1000720)
Supplement: Table S1 — TgMLC1 primer sequences. (0.05 MB PDF) [file ppat.1000720.s008.pdf]

**Supplementary Table 1.** TgMLC1 primer sequences.

|    | <b>Name</b>         | <b>Sequence</b>                                                        | <b>Target</b>                                                                           |
|----|---------------------|------------------------------------------------------------------------|-----------------------------------------------------------------------------------------|
| 1  | TgMLC1 5' B         | GGAAGATCTATGAGCAAGGTCGAGAAG                                            | 5' coding region of<br>TgMLC1 with BglII site                                           |
| 2  | TgMLC1 3' A         | CCTCCTAGGTTACTCCCTTCGCTCG                                              | 3' coding region of<br>TgMLC1 with AvrII site                                           |
| 3  | Myc-TgMLC1 5'       | GGAAGATCTATGGAGCAGAAGCTCATCTC<br>CGAGGAGGACCTGAGCAAGGTCGAGAAG          | 5' coding region of<br>TgMLC1 with 5' Myc tag<br>coding sequence                        |
| 4  | FLAG-TgMLC1 5'      | AGATCTATGGATTACAAGGATGACGACGAT<br>AAGATGAGCAAGGTCGAGAA                 | 5' coding region of<br>TgMLC1 with 5' FLAG tag<br>coding sequence                       |
| 5  | TgMLC1 79 3'        | CCTCCTAGGCTCCACCATCTCCTCGAGAG                                          | TgMLC1 coding region<br>binding from codon 79                                           |
| 6  | TgMLC1 UTR 5'       | AACGAAATTGTCCAGCCTT                                                    | Binds 28bp upstream of<br>TgMLC1 ATG start in 5'<br>UTR                                 |
| 7  | TgMLC1 UTR 3'       | AAACAGCTGTCCACACACAAA                                                  | Binds 34bp downstream of<br>TgMLC1 stop codon in 3'<br>UTR                              |
| 8  | Myc-TgMLC1 aa 80 5' | GGAAGATCTATGGAGCAGAAGCTCATCTCC<br>GAGGAGGACCTGGCCGACGAAATGTATGCG<br>CG | Binds to TgMLC1 coding<br>region starting at codon 80<br>with 5' Myc coding<br>sequence |
| 9  | TgMLC1 aa 193 3'    | CCTCCTAGGTTAGAAGTACTCCGCAGCCAA                                         | Binds to TgMLC1 coding<br>region starting at codon 193                                  |
| 10 | TgMLC1 aa 40 5'     | AGATCTATGCGCCCGGAACCGAAGGTGGGG<br>GAGTA                                | Binding to TgMLC1 coding<br>region starting at codon 40                                 |
| 11 | TgMLC1 aa 60 5'     | AGATCTATGGAGGGGGGGCGCCCTGCGGCA<br>GACGAA                               | Binding to TgMLC1 coding<br>region starting at codon 60                                 |
